# Supplementary material for: A phylogenomic study of Iridaceae Juss. based on complete plastid genome sequences
Source: Front Plant Sci. 2023 Jan 31;14:1066708. doi: 10.3389/fpls.2023.1066708 (PMC9948625; doi:10.3389/fpls.2023.1066708)
Supplement: Supplementary Table 2 — Assembly information of Iridaceae species analysed in this study using NGS. [file Table_2.xlsx]

## Sheet: Table S2
Supplementary table 2 Assembly information of Iridaceae species analysed in this study using NGS platform
Family	Plant species	Number of Total Read	Number of plastid DNA reads	Maximum Coverage
	Tritonia distichia	8181178	512121	1374
	Dierama igneum	15500140	497646	1432
	Chasmanthe floribunda	7086868	592750	1753
	Hesperantha coccinea	11378500	195668	5835
	Freesia laxa	10868914	1398625	3928
	Gladiolus communis	11441006	1109030	2833
	Watsonia pillansii	10453580	589432	1395
	Nivenia stokoei	10367092	519986	1315
	Witsenia maura	10937210	681754	1567
	Aristea ecklonii	11057162	1317967	2920
	Patersonia fragilis	11963824	442292	1211
	Tigridia pavonia	11163878	478971	1080
	Cypella coelestis	12828926	440729	1276
	Neomarica candida	9400904	59001	178
	Trimezia steyermarkii	9659188	535751	414073
	Sisyrinchium idahoense	11582456	283790	726
	Sisyrinchium angustifolium	8370084	279254	745
	Libertia pulchella	11206500	344513	925
	Olsynium douglasii	11645996	101141	320
	Iris koreana	13747306	139358	397
	Moraea spathulata	11155026	107720	591
	Moraea polystachya	13564816	85578	252
	Diplarrena moraea	13629656	703462	1705
	Isophysis tasmanica	12195976	393421	1030
Doryanthaceae	Doryanthes palmeri	8826532	481685	1261
Xeronemataceae	Xeronema callistemon	8781766	256895	1129
Tecophilaeaceae	Tecophilaea violiflora	9083874	628416	1336
