# Supplementary material for: A phylogenomic study of Iridaceae Juss. based on complete plastid genome sequences
Source: Front Plant Sci. 2023 Jan 31;14:1066708. doi: 10.3389/fpls.2023.1066708 (PMC9948625; doi:10.3389/fpls.2023.1066708)
Supplement: Supplementary Table 3 — Information of the associated Bio project, GenBank Accession, SRA, and Bio-sample numbers of the Iridaceae species analysed in this study. [file Table_3.xlsx]

## Sheet: Table S3
Supplementary Table 3 Information of the associated Bio project, GeneBank Accession, SRA, and Bio-sample numbers of the Iridaceae species analysed in this study
Family	Plant Name	GeneBank Accession No.	SRA	Biosample	Bioproject
Iridaceae	Aristea ecklonii	OP710243	SRR22121072	SAMN31543723	PRJNA896367
	Chasmanthe floribunda	OP710244	SRR22135887	SAMN31562530	PRJNA896367
	Cypella coelestis	OP710245	SRR22148796	SAMN31562503	PRJNA896367
	Dierama igneum	OP710246	SRR22149436	SAMN31562625	PRJNA896367
	Diplarrena moraea	OP710247	SRR22149442	SAMN31562774	PRJNA896367
	Freesia laxa	OP710248	SRR22137766	SAMN31564422	PRJNA896367
	Gladiolus communis	OP729159	SRR22137767	SAMN31565525	PRJNA896367
	Hesperantha coccinea	OP729160	SRR22163273	SAMN31577515	PRJNA896367
	Iris koreana	OP729162	SRR22184488	SAMN31596766	PRJNA896367
	Isophysis tasmanica	OP729163	SRR22184489	SAMN31596812	PRJNA896367
	Libertia pulchella	OP729164	SRR22164168	SAMN31580144	PRJNA896367
	Moraea polystachya	OP729165	SRR22163627	SAMN31577580	PRJNA896367
	Moraea spathulata	OP729166	SRR22163626	SAMN31577581	PRJNA896367
	Neomarica candida	OP729161	SRR22184582	SAMN31596816	PRJNA896367
	Nivenia stokoei	OP729167	SRR22163624	SAMN31577575	PRJNA896367
	Olsynium douglasii	OP729168	SRR22164167	SAMN31580145	PRJNA896367
	Patersonia fragilis	OP729169	SRR22215616	SAMN31596823	PRJNA896367
	Sisyrinchium angustifolium	OP745518	SRR22164170	SAMN31580142	PRJNA896367
	Sisyrinchium idahoense	OP745519	SRR22164169	SAMN31580143	PRJNA896367
	Tigridia pavonia	OP745520	SRR22184581	SAMN31596817	PRJNA896367
	Trimezia steyermarkii	OP745521	SRR22184580	SAMN31596818	PRJNA896367
	Tritonia disticha	OP745522	SRR22215618	SAMN31596821	PRJNA896367
	Watsonia pillansii	OP745523	SRR22215617	SAMN31596822	PRJNA896367
	Witsenia maura	OP745524	SRR22163623	SAMN31577576	PRJNA896367
Doryanthaceae	Doryanthes palmeri	OP745525	SRR22187050	SAMN31599112	PRJNA896367
Xeronemataceae	Xeronema callistemon	OP745526	SRR22187049	SAMN31599113	PRJNA896367
Tecophilaeaceae	Tecophileae violiflora	OP745527	SRR22187048	SAMN31599114	PRJNA896367
