# Supplementary material for: A phylogenomic study of Iridaceae Juss. based on complete plastid genome sequences
Source: Front Plant Sci. 2023 Jan 31;14:1066708. doi: 10.3389/fpls.2023.1066708 (PMC9948625; doi:10.3389/fpls.2023.1066708)
Supplement: Supplementary Table 4 — 4.1 Non-synonymous and synonymous rates for the protein-coding ycf2 gene. 4.2 Positive selective amino acid loci and parameter estimation in ycf2 of twelve species in the Iridaceae family species. [file Table_4.xlsx]

## Sheet: Table S4
Supplementary Table 4.1 Non-synonymous and synonymous rate of substitution for protein coding ycf2 gene
	Species	Ka	Ks	ka/ks ratio
	Tritonia disticha	0.124061	0.106207	1.16811
	Dierama igneum	0.14305	0.1089	1.31359
	Chasmanthe floribunda	0.25655	0.21695	1.18253
	Hesperantha coccinea	0.27035	0.22095	1.22358
	Crocus cartwrightianus	0.3119	0.2961	1.05336
	Crocus sativus	0.122127	0.1135	1.076
	Freesia laxa	0.30135	0.2798	1.07702
	Gladiolus communis	0.287447	0.272202	1.056
	Watsonia pillansii	0.0368784	0.0206987	1.78168
	Nivenia stokoei	0.00266477	0.00216431	1.23123
	Witsenia maura	0.00262549	0.00247352	1.06144
	Aristea ecklonii	0.2472	0.23395	1.05664
	Geosiris australiensis	0.2692	0.24795	1.0857
	Geosiris aphyla	0.0611036	0.0658871	0.927398
	Patersonia fragilis	0.39345	0.3756	1.04752
	Tigridia pavonia	0.3567	0.3449	1.03421
	Cypella coelestis	0.31855	0.3436	0.927095
	Neomarica candida	0.27975	0.2685	1.0419
	Trimezia steyermarkii	0.20165	0.19755	1.02075
	Sisyrinchium idahoense	0.32245	0.3126	1.03151
	Sisyrinchium angustifolium	0.36125	0.3576	1.01021
	Libertia pulchella	0.31105	0.3214	0.967797
	Olsynium douglasii	0.1744	0.16745	1.0415
	Iris domestica	0.18865	0.17805	1.05953
	Iris gatesii	0.1971	0.19445	1.01363
	Iris koreana	0.00200156	0.00139503	1.43478
	Iris sanguinea	0.233119	0.229547	1.01556
	Moraea spathulata	0.0333233	0.0346177	0.96261
	Moraea polystachya	0.29845	0.27835	1.07221
	Diplarrena moraea	0.2939	0.2826	1.03999
	Isophysis tasmanica	0.4097	0.3749	1.09282
	Supplementary Table 4.2 Positive selective amino acid loci and parameter estimation in ycf2 of twelve species in the Iridaceae family species
		Model	Np	Estimation of Parameters	InL	Model comparisons	d.f	2^InL	Positively selected sites (NEB, BEB)
		MO (one-ratio)	24		-11507.4	M3 vs M0	4	239.875	no sites
		M3 (discrete)	28		-11387.4
		M1 (NearlyNeutral)	25		-11460	M2 vs M1	2	145.975	no sites
		M2 (PositiveSelection)	27		-11387				14I**, 150S**, 341F**, 520L*, 778F*, 779Q*, 883W**, 892E**, 950P*, 1050H**, 1051N*, 1273I*, 1402S**, 1642D**, 2135L**
		M7 (beta)	25	p = 0.00500 q = 0.00752	-11460.8	M8 vs M7	2	22921.5	no sites
		M8 (beta&w>1)	27	p0 = 0.93151 p = 0.00647 q = 0.01981 (p1 = 0.06849) w = 10.65919	-11387.1				14I**, 150S**, 341F**, 520L*, 778F*, 779Q*, 883W**, 892E**, 950P*, 1050H**, 1051N*, 1273I*, 1402S**, 1642D**, 2135L**
Note: Positively selected sites (*p> 95%; p**> 99%)			Np: number of estimated parameters		InL: Log likelihood score				2^InL:twice the log likelihood difference of the model compared	d.f: degrees of freedom
