# Supplementary material for: A phylogenomic study of Iridaceae Juss. based on complete plastid genome sequences
Source: Front Plant Sci. 2023 Jan 31;14:1066708. doi: 10.3389/fpls.2023.1066708 (PMC9948625; doi:10.3389/fpls.2023.1066708)
Supplement: Supplementary Table 5 — Number of codons and relative synonymous codon usage values in 31 representative plastid genomes. [file Table_5.xlsx]

## Sheet: Aristea ecklonii
Supplementary Table 5 Number of codons and RSCU values in 31 representative plastid genomes
	Aristea ecklonii
	Codon	AA	ObsFreq	RSCU		abbreviation	codon	total ObsFreq	%
	UAA	*	0	0.000		A	Ala	1237	5.46644
	UAG	*	0	0.000		R	Arg	1368	6.04534
	UGA	*	0	0.000		N	Asn	1057	4.671
	GCA	A	337	1.09		D	Asp	913	4.03465
	GCC	A	207	0.669		C	Cys	263	1.16223
	GCG	A	118	0.382		Q	Gln	808	3.57064
	GCU	A	575	1.859		E	Glu	1209	5.3427
	UGC	C	54	0.411		G	Gly	1571	6.94242
	UGU	C	209	1.589		H	His	574	2.53657
	GAC	D	181	0.396		I	Ile	1998	8.82938
	GAU	D	732	1.604		L	Leu	2317	10.2391
	GAA	E	908	1.502		K	Lys	1171	5.17478
	GAG	E	301	0.498		M	Met	533	2.35538
	UUC	F	469	0.721		F	Phe	1301	5.74926
	UUU	F	832	1.279		P	Pro	929	4.10535
	GGA	G	638	1.624		S	Ser	1735	7.66715
	GGC	G	136	0.346		T	Thr	1176	5.19687
	GGG	G	254	0.647		W	Trp	393	1.73671
	GGU	G	543	1.383		Y	Tyr	829	3.66344
	CAC	H	126	0.439		V	Val	1247	5.51063
	CAU	H	448	1.561				22629
	AUA	I	652	0.979
	AUC	I	377	0.566
	AUU	I	969	1.455
	AAA	K	863	1.474
	AAG	K	308	0.526
	CUA	L	315	1.168
	CUC	L	157	0.582
	CUG	L	130	0.482
	CUU	L	477	1.768
	UUA	L	758	1.225
	UUG	L	480	0.775
	AUG	M	533	1
	AAC	N	228	0.431
	AAU	N	829	1.569
	CCA	P	269	1.158
	CCC	P	208	0.896
	CCG	P	113	0.487
	CCU	P	339	1.46
	CAA	Q	637	1.577
	CAG	Q	171	0.423
	AGA	R	424	1.506
	AGG	R	139	0.494
	CGA	R	316	1.57
	CGC	R	77	0.383
	CGG	R	92	0.457
	CGU	R	320	1.59
	AGC	S	92	0.421
	AGU	S	345	1.579
	UCA	S	365	1.125
	UCC	S	266	0.82
	UCG	S	160	0.493
	UCU	S	507	1.562
	ACA	T	386	1.313
	ACC	T	206	0.701
	ACG	T	114	0.388
	ACU	T	470	1.599
	GUA	V	473	1.517
	GUC	V	146	0.468
	GUG	V	172	0.552
	GUU	V	456	1.463
	UGG	W	393	1
	UAC	Y	148	0.357
	UAU	Y	681	1.643
				29

## Sheet: Chasmanthe florbunda
	Chasmanthe florbunda
	Codon	AA	ObsFreq	RSCU		abbreviation	codon	total ObsFreq	%
	UAA	*	0	0.000		A	Ala	1185	5.50369
	UAG	*	0	0.000		R	Arg	1265	5.87525
	UGA	*	0	0.000		N	Asn	1013	4.70484
	GCA	A	322	1.087		D	Asp	858	3.98495
	GCC	A	202	0.682		C	Cys	258	1.19827
	GCG	A	122	0.412		Q	Gln	744	3.45548
	GCU	A	539	1.819		E	Glu	1116	5.18322
	UGC	C	54	0.419		G	Gly	1478	6.86452
	UGU	C	204	1.581		H	His	552	2.56375
	GAC	D	172	0.401		I	Ile	1901	8.82913
	GAU	D	686	1.599		L	Leu	2229	10.3525
	GAA	E	848	1.52		K	Lys	1136	5.27611
	GAG	E	268	0.48		M	Met	511	2.37332
	UUC	F	442	0.707		F	Phe	1250	5.80558
	UUU	F	808	1.293		P	Pro	879	4.08249
	GGA	G	585	1.583		S	Ser	1648	7.65408
	GGC	G	146	0.395		T	Thr	1125	5.22502
	GGG	G	233	0.631		W	Trp	387	1.79741
	GGU	G	514	1.391		Y	Tyr	792	3.67842
	CAC	H	120	0.435		V	Val	1204	5.59194
	CAU	H	432	1.565				21531
	AUA	I	623	0.983
	AUC	I	360	0.568
	AUU	I	918	1.449
	AAA	K	860	1.514
	AAG	K	276	0.486
	CUA	L	302	1.144
	CUC	L	144	0.545
	CUG	L	132	0.5
	CUU	L	478	1.811
	UUA	L	733	1.25
	UUG	L	440	0.75
	AUG	M	511	1
	AAC	N	237	0.468
	AAU	N	776	1.532
	CCA	P	250	1.138
	CCC	P	200	0.91
	CCG	P	97	0.441
	CCU	P	332	1.511
	CAA	Q	581	1.562
	CAG	Q	163	0.438
	AGA	R	393	1.517
	AGG	R	125	0.483
	CGA	R	288	1.542
	CGC	R	68	0.364
	CGG	R	88	0.471
	CGU	R	303	1.622
	AGC	S	78	0.364
	AGU	S	350	1.636
	UCA	S	342	1.121
	UCC	S	264	0.866
	UCG	S	149	0.489
	UCU	S	465	1.525
	ACA	T	352	1.252
	ACC	T	201	0.715
	ACG	T	126	0.448
	ACU	T	446	1.586
	GUA	V	468	1.555
	GUC	V	139	0.462
	GUG	V	158	0.525
	GUU	V	439	1.458
	UGG	W	387	1
	UAC	Y	145	0.366
	UAU	Y	647	1.634
				29

## Sheet: Crocus cartwrightianus
	Crocus cartwrightianus
	Codon	AA	ObsFreq	RSCU		abbreviation	codon	total ObsFreq	%
	UAA	*	0	0.000		A	Ala	1241	5.49018
	UAG	*	0	0.000		R	Arg	1341	5.93258
	UGA	*	0	0.000		N	Asn	1071	4.7381
	GCA	A	342	1.102		D	Asp	896	3.9639
	GCC	A	198	0.638		C	Cys	263	1.16351
	GCG	A	128	0.413		Q	Gln	799	3.53477
	GCU	A	573	1.847		E	Glu	1190	5.26455
	UGC	C	58	0.441		G	Gly	1573	6.95895
	UGU	C	205	1.559		H	His	577	2.55265
	GAC	D	165	0.368		I	Ile	1980	8.75951
	GAU	D	731	1.632		L	Leu	2336	10.3345
	GAA	E	897	1.508		K	Lys	1211	5.35746
	GAG	E	293	0.492		M	Met	540	2.38896
	UUC	F	448	0.696		F	Phe	1288	5.69811
	UUU	F	840	1.304		P	Pro	934	4.13201
	GGA	G	642	1.633		S	Ser	1710	7.56503
	GGC	G	141	0.359		T	Thr	1174	5.19377
	GGG	G	246	0.626		W	Trp	394	1.74305
	GGU	G	544	1.383		Y	Tyr	832	3.68076
	CAC	H	123	0.426		V	Val	1254	5.54769
	CAU	H	454	1.574				22604
	AUA	I	642	0.973
	AUC	I	375	0.568
	AUU	I	963	1.459
	AAA	K	922	1.523
	AAG	K	289	0.477
	CUA	L	321	1.18
	CUC	L	154	0.566
	CUG	L	124	0.456
	CUU	L	489	1.798
	UUA	L	770	1.234
	UUG	L	478	0.766
	AUG	M	540	1
	AAC	N	241	0.45
	AAU	N	830	1.55
	CCA	P	281	1.203
	CCC	P	209	0.895
	CCG	P	97	0.415
	CCU	P	347	1.486
	CAA	Q	625	1.564
	CAG	Q	174	0.436
	AGA	R	425	1.523
	AGG	R	133	0.477
	CGA	R	297	1.517
	CGC	R	72	0.368
	CGG	R	97	0.496
	CGU	R	317	1.619
	AGC	S	85	0.394
	AGU	S	347	1.606
	UCA	S	362	1.133
	UCC	S	260	0.814
	UCG	S	150	0.469
	UCU	S	506	1.584
	ACA	T	363	1.237
	ACC	T	207	0.705
	ACG	T	128	0.436
	ACU	T	476	1.622
	GUA	V	483	1.541
	GUC	V	142	0.453
	GUG	V	166	0.53
	GUU	V	463	1.477
	UGG	W	394	1
	UAC	Y	157	0.377
	UAU	Y	675	1.623
				29

## Sheet: Crocus sativus
	Crocus sativus
	Codon	AA	ObsFreq	RSCU		abbreviation	codon	total ObsFreq	%
	UAA	*	0	0.000		A	Ala	1242	5.49485
	UAG	*	0	0.000		R	Arg	1340	5.92842
	UGA	*	0	0.000		N	Asn	1069	4.72946
	GCA	A	342	1.101		D	Asp	895	3.95965
	GCC	A	199	0.641		C	Cys	263	1.16356
	GCG	A	128	0.412		Q	Gln	799	3.53493
	GCU	A	573	1.845		E	Glu	1191	5.26921
	UGC	C	58	0.441		G	Gly	1573	6.95925
	UGU	C	205	1.559		H	His	577	2.55276
	GAC	D	164	0.366		I	Ile	1979	8.75547
	GAU	D	731	1.634		L	Leu	2336	10.3349
	GAA	E	898	1.508		K	Lys	1212	5.36212
	GAG	E	293	0.492		M	Met	540	2.38906
	UUC	F	447	0.694		F	Phe	1288	5.69836
	UUU	F	841	1.306		P	Pro	934	4.13219
	GGA	G	642	1.633		S	Ser	1710	7.56537
	GGC	G	141	0.359		T	Thr	1173	5.18958
	GGG	G	246	0.626		W	Trp	394	1.74313
	GGU	G	544	1.383		Y	Tyr	833	3.68535
	CAC	H	123	0.426		V	Val	1255	5.55236
	CAU	H	454	1.574				22603
	AUA	I	640	0.97
	AUC	I	374	0.567
	AUU	I	965	1.463
	AAA	K	924	1.525
	AAG	K	288	0.475
	CUA	L	321	1.179
	CUC	L	155	0.569
	CUG	L	124	0.455
	CUU	L	489	1.796
	UUA	L	771	1.237
	UUG	L	476	0.763
	AUG	M	540	1
	AAC	N	241	0.451
	AAU	N	828	1.549
	CCA	P	280	1.199
	CCC	P	210	0.899
	CCG	P	97	0.415
	CCU	P	347	1.486
	CAA	Q	625	1.564
	CAG	Q	174	0.436
	AGA	R	424	1.522
	AGG	R	133	0.478
	CGA	R	297	1.517
	CGC	R	73	0.373
	CGG	R	97	0.496
	CGU	R	316	1.614
	AGC	S	85	0.393
	AGU	S	348	1.607
	UCA	S	362	1.134
	UCC	S	260	0.814
	UCG	S	149	0.467
	UCU	S	506	1.585
	ACA	T	363	1.238
	ACC	T	207	0.706
	ACG	T	128	0.436
	ACU	T	475	1.62
	GUA	V	484	1.543
	GUC	V	142	0.453
	GUG	V	166	0.529
	GUU	V	463	1.476
	UGG	W	394	1
	UAC	Y	157	0.377
	UAU	Y	676	1.623
				29

## Sheet: Cypella coelestis
	Cypella coelestis
	Codon	AA	ObsFreq	RSCU		abbreviation	codon	total ObsFreq	%
	UAA	*	0	0.000		A	Ala	1252	5.54645
	UAG	*	0	0.000		R	Arg	1360	6.0249
	UGA	*	0	0.000		N	Asn	1057	4.68259
	GCA	A	348	1.112		D	Asp	901	3.99149
	GCC	A	201	0.642		C	Cys	254	1.12524
	GCG	A	135	0.431		Q	Gln	792	3.50862
	GCU	A	568	1.815		E	Glu	1220	5.40469
	UGC	C	53	0.417		G	Gly	1573	6.9685
	UGU	C	201	1.583		H	His	549	2.43211
	GAC	D	175	0.388		I	Ile	1967	8.71395
	GAU	D	726	1.612		L	Leu	2328	10.3132
	GAA	E	914	1.498		K	Lys	1183	5.24077
	GAG	E	306	0.502		M	Met	537	2.37895
	UUC	F	460	0.703		F	Phe	1308	5.79453
	UUU	F	848	1.297		P	Pro	943	4.17756
	GGA	G	630	1.602		S	Ser	1714	7.59314
	GGC	G	154	0.392		T	Thr	1141	5.05471
	GGG	G	266	0.676		W	Trp	400	1.77203
	GGU	G	523	1.33		Y	Tyr	829	3.67253
	CAC	H	122	0.444		V	Val	1265	5.60404
	CAU	H	427	1.556				22573
	AUA	I	625	0.953
	AUC	I	392	0.598
	AUU	I	950	1.449
	AAA	K	892	1.508
	AAG	K	291	0.492
	CUA	L	317	1.162
	CUC	L	150	0.55
	CUG	L	135	0.495
	CUU	L	489	1.793
	UUA	L	759	1.227
	UUG	L	478	0.773
	AUG	M	537	1
	AAC	N	236	0.447
	AAU	N	821	1.553
	CCA	P	275	1.166
	CCC	P	212	0.899
	CCG	P	112	0.475
	CCU	P	344	1.459
	CAA	Q	608	1.535
	CAG	Q	184	0.465
	AGA	R	412	1.498
	AGG	R	138	0.502
	CGA	R	325	1.605
	CGC	R	80	0.395
	CGG	R	96	0.474
	CGU	R	309	1.526
	AGC	S	92	0.42
	AGU	S	346	1.58
	UCA	S	367	1.15
	UCC	S	271	0.85
	UCG	S	161	0.505
	UCU	S	477	1.495
	ACA	T	338	1.185
	ACC	T	213	0.747
	ACG	T	130	0.456
	ACU	T	460	1.613
	GUA	V	465	1.47
	GUC	V	150	0.474
	GUG	V	188	0.594
	GUU	V	462	1.461
	UGG	W	400	1
	UAC	Y	164	0.396
	UAU	Y	665	1.604
				29

## Sheet: Dierama igneum
	Dierama igneum
	Codon	AA	ObsFreq	RSCU		abbreviation	codon	total ObsFreq	%
	UAA	*	0	0.000		A	Ala	1247	5.52136
	UAG	*	0	0.000		R	Arg	1361	6.02612
	UGA	*	0	0.000		N	Asn	1063	4.70666
	GCA	A	336	1.078		D	Asp	899	3.98052
	GCC	A	210	0.674		C	Cys	268	1.18663
	GCG	A	138	0.443		Q	Gln	789	3.49347
	GCU	A	563	1.806		E	Glu	1180	5.22471
	UGC	C	55	0.41		G	Gly	1579	6.99137
	UGU	C	213	1.59		H	His	576	2.55037
	GAC	D	174	0.387		I	Ile	1992	8.82001
	GAU	D	725	1.613		L	Leu	2339	10.3564
	GAA	E	888	1.505		K	Lys	1180	5.22471
	GAG	E	292	0.495		M	Met	535	2.36883
	UUC	F	451	0.702		F	Phe	1285	5.68962
	UUU	F	834	1.298		P	Pro	928	4.10892
	GGA	G	644	1.631		S	Ser	1721	7.6201
	GGC	G	155	0.393		T	Thr	1170	5.18043
	GGG	G	254	0.643		W	Trp	394	1.74452
	GGU	G	526	1.332		Y	Tyr	826	3.65729
	CAC	H	125	0.434		V	Val	1253	5.54793
	CAU	H	451	1.566				22585
	AUA	I	649	0.977
	AUC	I	372	0.56
	AUU	I	971	1.462
	AAA	K	887	1.503
	AAG	K	293	0.497
	CUA	L	315	1.148
	CUC	L	154	0.561
	CUG	L	139	0.506
	CUU	L	490	1.785
	UUA	L	772	1.244
	UUG	L	469	0.756
	AUG	M	535	1
	AAC	N	246	0.463
	AAU	N	817	1.537
	CCA	P	262	1.129
	CCC	P	224	0.966
	CCG	P	105	0.453
	CCU	P	337	1.453
	CAA	Q	621	1.574
	CAG	Q	168	0.426
	AGA	R	419	1.504
	AGG	R	138	0.496
	CGA	R	299	1.488
	CGC	R	84	0.418
	CGG	R	110	0.547
	CGU	R	311	1.547
	AGC	S	88	0.396
	AGU	S	356	1.604
	UCA	S	355	1.112
	UCC	S	262	0.821
	UCG	S	163	0.511
	UCU	S	497	1.557
	ACA	T	359	1.227
	ACC	T	209	0.715
	ACG	T	136	0.465
	ACU	T	466	1.593
	GUA	V	476	1.52
	GUC	V	146	0.466
	GUG	V	164	0.524
	GUU	V	467	1.491
	UGG	W	394	1
	UAC	Y	152	0.368
	UAU	Y	674	1.632
				29

## Sheet: Diplarrena moraea
	Diplarrena moraea
	Codon	AA	ObsFreq	RSCU		abbreviation	codon	total ObsFreq	%
	UAA	*	0	0.000		A	Ala	1247	5.53632
	UAG	*	0	0.000		R	Arg	1346	5.97585
	UGA	*	0	0.000		N	Asn	1066	4.73273
	GCA	A	353	1.132		D	Asp	900	3.99574
	GCC	A	193	0.619		C	Cys	262	1.1632
	GCG	A	122	0.391		Q	Gln	801	3.55621
	GCU	A	579	1.857		E	Glu	1214	5.38981
	UGC	C	49	0.374		G	Gly	1578	7.00586
	UGU	C	213	1.626		H	His	569	2.52619
	GAC	D	175	0.389		I	Ile	1948	8.64855
	GAU	D	725	1.611		L	Leu	2302	10.2202
	GAA	E	917	1.511		K	Lys	1170	5.19446
	GAG	E	297	0.489		M	Met	542	2.40632
	UUC	F	465	0.729		F	Phe	1275	5.66063
	UUU	F	810	1.271		P	Pro	948	4.20884
	GGA	G	651	1.65		S	Ser	1724	7.65406
	GGC	G	148	0.375		T	Thr	1146	5.08791
	GGG	G	247	0.626		W	Trp	396	1.75812
	GGU	G	532	1.349		Y	Tyr	826	3.6672
	CAC	H	137	0.482		V	Val	1264	5.61179
	CAU	H	432	1.518				22524
	AUA	I	615	0.947
	AUC	I	389	0.599
	AUU	I	944	1.454
	AAA	K	881	1.506
	AAG	K	289	0.494
	CUA	L	319	1.173
	CUC	L	153	0.563
	CUG	L	136	0.5
	CUU	L	480	1.765
	UUA	L	740	1.219
	UUG	L	474	0.781
	AUG	M	542	1
	AAC	N	243	0.456
	AAU	N	823	1.544
	CCA	P	267	1.127
	CCC	P	200	0.844
	CCG	P	115	0.485
	CCU	P	366	1.544
	CAA	Q	628	1.568
	CAG	Q	173	0.432
	AGA	R	409	1.506
	AGG	R	134	0.494
	CGA	R	316	1.574
	CGC	R	64	0.319
	CGG	R	93	0.463
	CGU	R	330	1.644
	AGC	S	81	0.364
	AGU	S	364	1.636
	UCA	S	359	1.123
	UCC	S	266	0.832
	UCG	S	162	0.507
	UCU	S	492	1.539
	ACA	T	352	1.229
	ACC	T	214	0.747
	ACG	T	129	0.45
	ACU	T	451	1.574
	GUA	V	485	1.535
	GUC	V	150	0.475
	GUG	V	174	0.551
	GUU	V	455	1.44
	UGG	W	396	1
	UAC	Y	167	0.404
	UAU	Y	659	1.596
				29

## Sheet: Freesia laxa
	Freesia laxa
	Codon	AA	ObsFreq	RSCU		abbreviation	codon	total ObsFreq	%
	UAA	*	0	0.000		A	Ala	1240	5.48066
	UAG	*	0	0.000		R	Arg	1357	5.99779
	UGA	*	0	0.000		N	Asn	1068	4.72044
	GCA	A	339	1.094		D	Asp	905	4
	GCC	A	203	0.655		C	Cys	269	1.18895
	GCG	A	126	0.406		Q	Gln	794	3.50939
	GCU	A	572	1.845		E	Glu	1188	5.25083
	UGC	C	61	0.454		G	Gly	1573	6.95249
	UGU	C	208	1.546		H	His	575	2.54144
	GAC	D	174	0.385		I	Ile	1988	8.78674
	GAU	D	731	1.615		L	Leu	2331	10.3028
	GAA	E	891	1.5		K	Lys	1186	5.24199
	GAG	E	297	0.5		M	Met	541	2.39116
	UUC	F	453	0.701		F	Phe	1293	5.71492
	UUU	F	840	1.299		P	Pro	940	4.1547
	GGA	G	633	1.61		S	Ser	1719	7.59779
	GGC	G	152	0.387		T	Thr	1181	5.21989
	GGG	G	258	0.656		W	Trp	391	1.72818
	GGU	G	530	1.348		Y	Tyr	832	3.67735
	CAC	H	130	0.452		V	Val	1254	5.54254
	CAU	H	445	1.548				22625
	AUA	I	642	0.969
	AUC	I	369	0.557
	AUU	I	977	1.474
	AAA	K	901	1.519
	AAG	K	285	0.481
	CUA	L	309	1.126
	CUC	L	156	0.568
	CUG	L	140	0.51
	CUU	L	493	1.796
	UUA	L	765	1.241
	UUG	L	468	0.759
	AUG	M	541	1
	AAC	N	243	0.455
	AAU	N	825	1.545
	CCA	P	272	1.157
	CCC	P	224	0.953
	CCG	P	104	0.443
	CCU	P	340	1.447
	CAA	Q	621	1.564
	CAG	Q	173	0.436
	AGA	R	423	1.524
	AGG	R	132	0.476
	CGA	R	308	1.536
	CGC	R	77	0.384
	CGG	R	100	0.499
	CGU	R	317	1.581
	AGC	S	88	0.4
	AGU	S	352	1.6
	UCA	S	359	1.123
	UCC	S	269	0.841
	UCG	S	156	0.488
	UCU	S	495	1.548
	ACA	T	363	1.229
	ACC	T	209	0.708
	ACG	T	136	0.461
	ACU	T	473	1.602
	GUA	V	482	1.537
	GUC	V	143	0.456
	GUG	V	167	0.533
	GUU	V	462	1.474
	UGG	W	391	1
	UAC	Y	155	0.373
	UAU	Y	677	1.627
				29

## Sheet: Geosiris aphylla
	Geosiris aphylla
	Codon	AA	ObsFreq	RSCU		abbreviation	codon	total ObsFreq	%
	UAA	*	0	0.000		A	Ala	277	3.65677
	UAG	*	0	0.000		R	Arg	601	7.93399
	UGA	*	0	0.000		N	Asn	453	5.9802
	GCA	A	92	1.329		D	Asp	324	4.27723
	GCC	A	52	0.751		C	Cys	98	1.29373
	GCG	A	23	0.332		Q	Gln	266	3.51155
	GCU	A	110	1.588		E	Glu	415	5.47855
	UGC	C	26	0.531		G	Gly	418	5.51815
	UGU	C	72	1.469		H	His	178	2.34983
	GAC	D	62	0.383		I	Ile	685	9.0429
	GAU	D	262	1.617		L	Leu	682	9.0033
	GAA	E	306	1.475		K	Lys	656	8.66007
	GAG	E	109	0.525		M	Met	175	2.31023
	UUC	F	144	0.729		F	Phe	395	5.21452
	UUU	F	251	1.271		P	Pro	290	3.82838
	GGA	G	156	1.493		S	Ser	601	7.93399
	GGC	G	45	0.431		T	Thr	356	4.69967
	GGG	G	86	0.823		W	Trp	101	1.33333
	GGU	G	131	1.254		Y	Tyr	270	3.56436
	CAC	H	37	0.416		V	Val	334	4.40924
	CAU	H	141	1.584				7575
	AUA	I	233	1.02
	AUC	I	125	0.547
	AUU	I	327	1.432
	AAA	K	498	1.518
	AAG	K	158	0.482
	CUA	L	96	1.126
	CUC	L	40	0.469
	CUG	L	51	0.598
	CUU	L	154	1.806
	UUA	L	200	1.173
	UUG	L	141	0.827
	AUG	M	175	1
	AAC	N	110	0.486
	AAU	N	343	1.514
	CCA	P	79	1.09
	CCC	P	80	1.103
	CCG	P	33	0.455
	CCU	P	98	1.352
	CAA	Q	207	1.556
	CAG	Q	59	0.444
	AGA	R	210	1.533
	AGG	R	64	0.467
	CGA	R	128	1.566
	CGC	R	29	0.355
	CGG	R	44	0.538
	CGU	R	126	1.541
	AGC	S	33	0.458
	AGU	S	111	1.542
	UCA	S	134	1.173
	UCC	S	99	0.867
	UCG	S	71	0.621
	UCU	S	153	1.339
	ACA	T	122	1.371
	ACC	T	72	0.809
	ACG	T	49	0.551
	ACU	T	113	1.27
	GUA	V	110	1.317
	GUC	V	49	0.587
	GUG	V	42	0.503
	GUU	V	133	1.593
	UGG	W	101	1
	UAC	Y	51	0.378
	UAU	Y	219	1.622
				31

## Sheet: Geosiris australiensis
	Geosiris australiensis
	Codon	AA	ObsFreq	RSCU		abbreviation	codon	total ObsFreq	%
	UAA	*	0	0.000		A	Ala	311	5.02099
	UAG	*	0	0.000		R	Arg	524	8.4598
	UGA	*	0	0.000		N	Asn	329	5.31159
	GCA	A	95	1.222		D	Asp	262	4.2299
	GCC	A	68	0.875		C	Cys	81	1.30772
	GCG	A	32	0.412		Q	Gln	215	3.4711
	GCU	A	116	1.492		E	Glu	315	5.08557
	UGC	C	20	0.494		G	Gly	398	6.42557
	UGU	C	61	1.506		H	His	151	2.43784
	GAC	D	45	0.344		I	Ile	560	9.04101
	GAU	D	217	1.656		L	Leu	578	9.33161
	GAA	E	213	1.352		K	Lys	411	6.63545
	GAG	E	102	0.648		M	Met	148	2.38941
	UUC	F	117	0.804		F	Phe	291	4.69809
	UUU	F	174	1.196		P	Pro	261	4.21376
	GGA	G	141	1.417		S	Ser	504	8.13691
	GGC	G	59	0.593		T	Thr	281	4.53665
	GGG	G	82	0.824		W	Trp	76	1.22699
	GGU	G	116	1.166		Y	Tyr	192	3.09977
	CAC	H	34	0.45		V	Val	306	4.94026
	CAU	H	117	1.55				6194
	AUA	I	177	0.948
	AUC	I	106	0.568
	AUU	I	277	1.484
	AAA	K	291	1.416
	AAG	K	120	0.584
	CUA	L	78	1.061
	CUC	L	37	0.503
	CUG	L	44	0.599
	CUU	L	135	1.837
	UUA	L	150	1.056
	UUG	L	134	0.944
	AUG	M	148	1
	AAC	N	82	0.498
	AAU	N	247	1.502
	CCA	P	60	0.92
	CCC	P	72	1.103
	CCG	P	42	0.644
	CCU	P	87	1.333
	CAA	Q	164	1.526
	CAG	Q	51	0.474
	AGA	R	169	1.438
	AGG	R	66	0.562
	CGA	R	108	1.495
	CGC	R	29	0.401
	CGG	R	43	0.595
	CGU	R	109	1.509
	AGC	S	28	0.463
	AGU	S	93	1.537
	UCA	S	113	1.18
	UCC	S	93	0.971
	UCG	S	51	0.533
	UCU	S	126	1.316
	ACA	T	87	1.238
	ACC	T	51	0.726
	ACG	T	41	0.584
	ACU	T	102	1.452
	GUA	V	109	1.425
	GUC	V	39	0.51
	GUG	V	40	0.523
	GUU	V	118	1.542
	UGG	W	76	1
	UAC	Y	35	0.365
	UAU	Y	157	1.635
				29

[truncated: 21 more sheets: Gladiolus communis, Hesperantha coccinea, Iris domestica, Iris gatesii, Iris koreana, Iris sanguinea, Isophysis tasmanica, Liberta pulchella, Moraea polystachya, Moraea spathulata, Neomarica candida, Nivenia stokoei, Olsynium douglasii, Patersonia fragilis, Sisyrinchium angustifolium, Sisyrinchium idahoense, Tigridia pavonia, Trimezia steyermarkii, Tritonia distichium, Watsonia pillansii …]
