# Supplementary material for: A phylogenomic study of Iridaceae Juss. based on complete plastid genome sequences
Source: Frontiers journal article supplement (doi:10.3389/fpls.2023.1066708), 2023-01-31
Supplement: Table_1.xlsx [file Table_1.xlsx]

## Sheet: Table S1
Sr. No.	Sr. no._Gene Name	Nucleotide diversity Pi	Standard deviation Pi	No. of Polymorphic(segregating) sites S	Total no. of Mutations Eta	Window Length	Step size
	1_psbA	0.02353	0.0033	36	40	100	25
	2_matK	0.07907	0.00364	613	764	100	25
	3_rps16	0.04456	0.00686	68	81	100	25
	4_psbK	0.06498	0.00328	48	54	100	25
	5_psbl	0.02353	0.00415	19	20	100	25
	6_atpA	0.0412	0.00451	101	118	100	25
	7_atpF	0.04547	0.00242	124	137	100	25
	8_atpH	0.02963	0.00224	41	45	100	25
	9_atpl	0.0245	0.00121	102	113	100	25
	10_rps2	0.05104	0.00378	178	195	100	25
	11_rpoC2	0.05095	0.00202	1016	1170	100	25
	12_rpoC1	0.03336	0.00154	381	428	100	25
	13_rpoB	0.03127	0.00167	331	369	100	25
	14_petN	0.00739	0.00215	6	7	46	12
	15_psbM	0.02721	0.0029	15	16	100	25
	16_psbD	0.02094	0.00108	124	136	100	25
	17_psbC	0.02794	0.00186	206	226	100	25
	18_psbZ	0.0227	0.00245	31	33	100	25
	19_rps14	0.02958	0.00249	57	62	100	25
	20_psaB	0.02391	0.00132	282	321	100	25
	21_psaA	0.03948	0.02062	82	89	100	25
	22_ycf3	0.03826	0.01741	79	84	100	25
	23_rps4	0.03841	0.0024	128	141	100	25
	24_ndhJ	0.05324	0.00974	104	118	100	25
	25_ndhK	0.0903	0.01698	29	39	100	25
	26_ndhC	0.03296	0.00164	62	68	100	25
	27_atpE	0.03443	0.00413	89	92	100	25
	28_atpB	0.04296	0.00342	71	75	100	25
	29_rbcL	0.06234	0.02924	33	38	100	25
	30_accD	0.05649	0.00362	288	337	100	25
	31_psaL	0.03135	0.01007	30	34	100	25
	32_ycf4	0.04643	0.02466	32	37	100	25
	33_cemA	0.04054	0.00314	160	187	100	25
	34_petA	0.0408	0.00207	196	221	100	25
	35_psbJ	0.02002	0.00178	12	12	100	25
	36_psbL	0.0173	0.00196	8	9	100	25
	37_psbF	0.02307	0.00242	13	13	100	25
	38_psbE	0.0236	0.00203	28	32	100	25
	39_petL	0.02317	0.00201	12	13	49	13
	40_petG	0.04425	0.02675	52	55	100	25
	41_psaJ	0.03154	0.00215	19	20	100	25
	42_rpl33	0.05133	0.00421	57	68	100	25
	43_rps18	0.03135	0.00296	69	74	100	25
	44_rpl20	0.05125	0.00381	105	125	100	25
	45_rps12	0.01412	0.00144	36	38	100	25
	46_clpP1	0.04306	0.00398	153	184	100	25
	47_psbB	0.03225	0.00139	237	275	100	25
	48_psbT	0.05738	0.01968	45	49	100	25
	49_psbN	0.03324	0.01131	14	14	100	25
	50_psbH	0.06262	0.02269	104	114	100	25
	51_petB	0.02791	0.00146	87	97	100	25
	52_petD	0.0301	0.00175	68	80	100	25
	53_rpoA	0.05859	0.0149	237	272	100	25
	54_rps11	0.05263	0.00272	89	111	100	25
	55_rpl36	0.04039	0.0038	24	30	100	25
	56_infA	0.03688	0.00258	53	63	100	25
	57_rps8	0.04794	0.00342	101	119	100	25
	58_rpl14	0.04167	0.00312	88	101	100	25
	59_rpl16	0.04115	0.00301	93	110	100	25
	60_rps3	0.05088	0.00284	185	219	100	25
	61_rpl22	0.06105	0.00314	89	103	100	25
	62_rps19	0.02186	0.00207	38	42	100	25
	63_rpl2	0.01604	0.00154	73	80	100	25
	64_rpl23	0.01185	0.00182	21	23	100	25
	65_ycf2	0.02072	0.00147	804	855	100	25
	66_ndhB	0.01098	0.00416	22	23	100	25
	67_rps7	0.00825	0.00114	34	34	100	25
	68_ndhF	0.06347	0.0026	617	768	100	25
	69_rpl32	0.04013	0.00473	27	33	100	25
	70_ccsA	0.06018	0.00334	281	328	100	25
	71_ndhD	0.07626	0.01407	87	108	100	25
	72_psaC	0.02475	0.00246	37	42	100	25
	73_ndhE	0.05075	0.00359	79	85	100	25
	74_ndhG	0.07707	0.01131	146	167	100	25
	75_ndhL	0.04295	0.00206	122	133	100	25
	76_ndhA	0.07732	0.04313	123	136	100	25
	77_ndhH	0.035	0.00459	66	72	100	25
	78_rps15	0.08153	0.00339	92	113	100	25
	79_ycf1	0.12579	0.00585	1360	1847	100	25
	80_trnK-UUU tRNA	0.01359	0.0039	8	9	37	10
	81_trnQ-UUG tRNA	0.04019	0.00582	7	9	37	10
	82_trnS-GCU tRNA	0.02532	0.00326	14	14	45	12
	83_trnG-UCC tRNA	0.00544	0.0028	4	4	37	10
	84_trnR-UCU tRNA	0.00621	0.00255	6	6	37	10
	85_trnC-GCA tRNA	0.01457	0.00306	8	9	36	9
	86_trnD-GUC tRNA	0.00796	0.00241	4	4	38	10
	87_trnY-GUA tRNA	0.01045	0.00317	9	9	43	11
	88_trnE-UUC tRNA	0.00259	0.00172	2	2	38	10
	89_trnT-GGU tRNA	0.01511	0.00215	7	7	37	10
	90_trnS-UGA tRNA	0.01636	0.00332	12	13	48	12
	91_trnG-GCC tRNA	0.02193	0.00264	5	5	36	9
	92_trnfM-CAU tRNA	0.00907	0.00224	5	5	38	10
	93_trnS-GGA tRNA	0.0218	0.00277	7	8	46	12
	94_trnT-UGU tRNA	0.01511	0.00201	4	6	37	10
	95_trnL-UAA tRNA	0.00325	0.00177	4	4	43	11
	96_trnF-GAA tRNA	0.00577	0.00168	3	3	37	10
	97_trnV-UAC tRNA	0.00517	0.0021	5	5	38	10
	98_trnM-CAU tRNA	0.00595	0.00211	4	4	37	10
	99_trnW-CCA tRNA	0.01174	0.00221	6	6	38	10
	100_trnP-UGG tRNA	0.00901	0.00362	5	5	38	10
	101_trnH-GUG tRNA	0.00258	0.00175	3	3	38	10
	102_trnl-CAU tRNA	0.00169	0.00104	1	1	38	10
	103_trnL-CAA tRNA	0.00239	0.00123	3	3	44	11
	104_trnV-GAC tRNA	0.00532	0.00214	5	5	37	10
	105_trnl-GAU tRNA	0.00263	0.00132	2	2	37	10
	106_trnA-UGC	0	0	0	0	37	10
	107_trnR-ACG tRNA	0.00174	0.00112	2	2	38	10
	108_trnN-GUU tRNA	0	0	0	0	37	10
	109_trnL-UAG tRNA	0.01543	0.00473	11	12	41	11
	110_rrn16 rRNA	0.00267	0.00041	39	40	100	25
	111_rrn23 rRNA	0.00383	0.00053	92	93	100	25
	112_rrn4.5 rRNA	0.00367	0.00147	4	4	100	25
	113_rrn5 rRNA	0.00267	0.00159	5	5	100	25
